# Supplementary material for: Rapid quality control of medicine and food dual purpose plant polysaccharides by matrix assisted laser desorption/ionization mass spectrometry
Source: Royal Society of Chemistry journal article supplement (doi:10.1039/c9an02440a), 2020-01-01
Supplement: c9an02440a1.pdf [file c9an02440a1.pdf]

# Supplementary Information

## Rapid Quality Control of Medicine and Food Dual Purposes Plant Polysaccharides by Matrix Assisted Laser Desorption/Ionization Mass Spectrometry

Huiwen Wang,<sup>a, †</sup> Xiaoyong Zhao,<sup>a, †</sup> Yu Huang,<sup>a</sup> Jiancong Liao,<sup>a</sup> Yaqin Liu<sup>a</sup> and Yuanjiang Pan<sup>a, \*</sup>

<sup>1</sup> Department of Chemistry, Zhejiang University, Hangzhou 310027, China; panyuanjiang@zju.edu.cn

\* Correspondence: panyuanjiang@zju.edu.cn; Tel.: +86 571 87951629

<sup>†</sup> These authors contributed equally to this study.

### Table of contents

|            |     |
|------------|-----|
| Cover page | S1  |
| Figure S1  | S2  |
| Figure S2  | S3  |
| Figure S3  | S4  |
| Figure S4  | S5  |
| Figure S5  | S6  |
| Figure S6  | S7  |
| Figure S7  | S8  |
| Figure S8  | S9  |
| Figure S9  | S10 |
| Figure S10 | S11 |

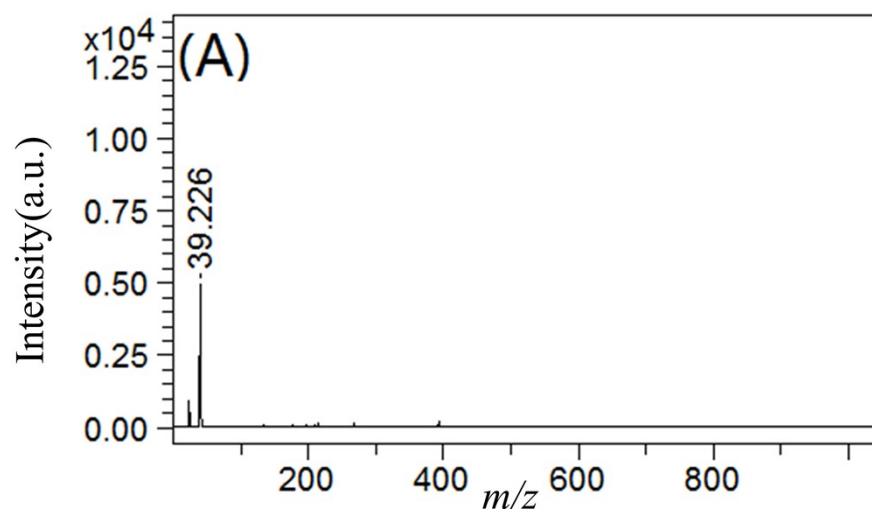

**Figure S1.** MALDI-TOF spectrum for  $\text{Fe}_3\text{O}_4$  NPs in positive mode.

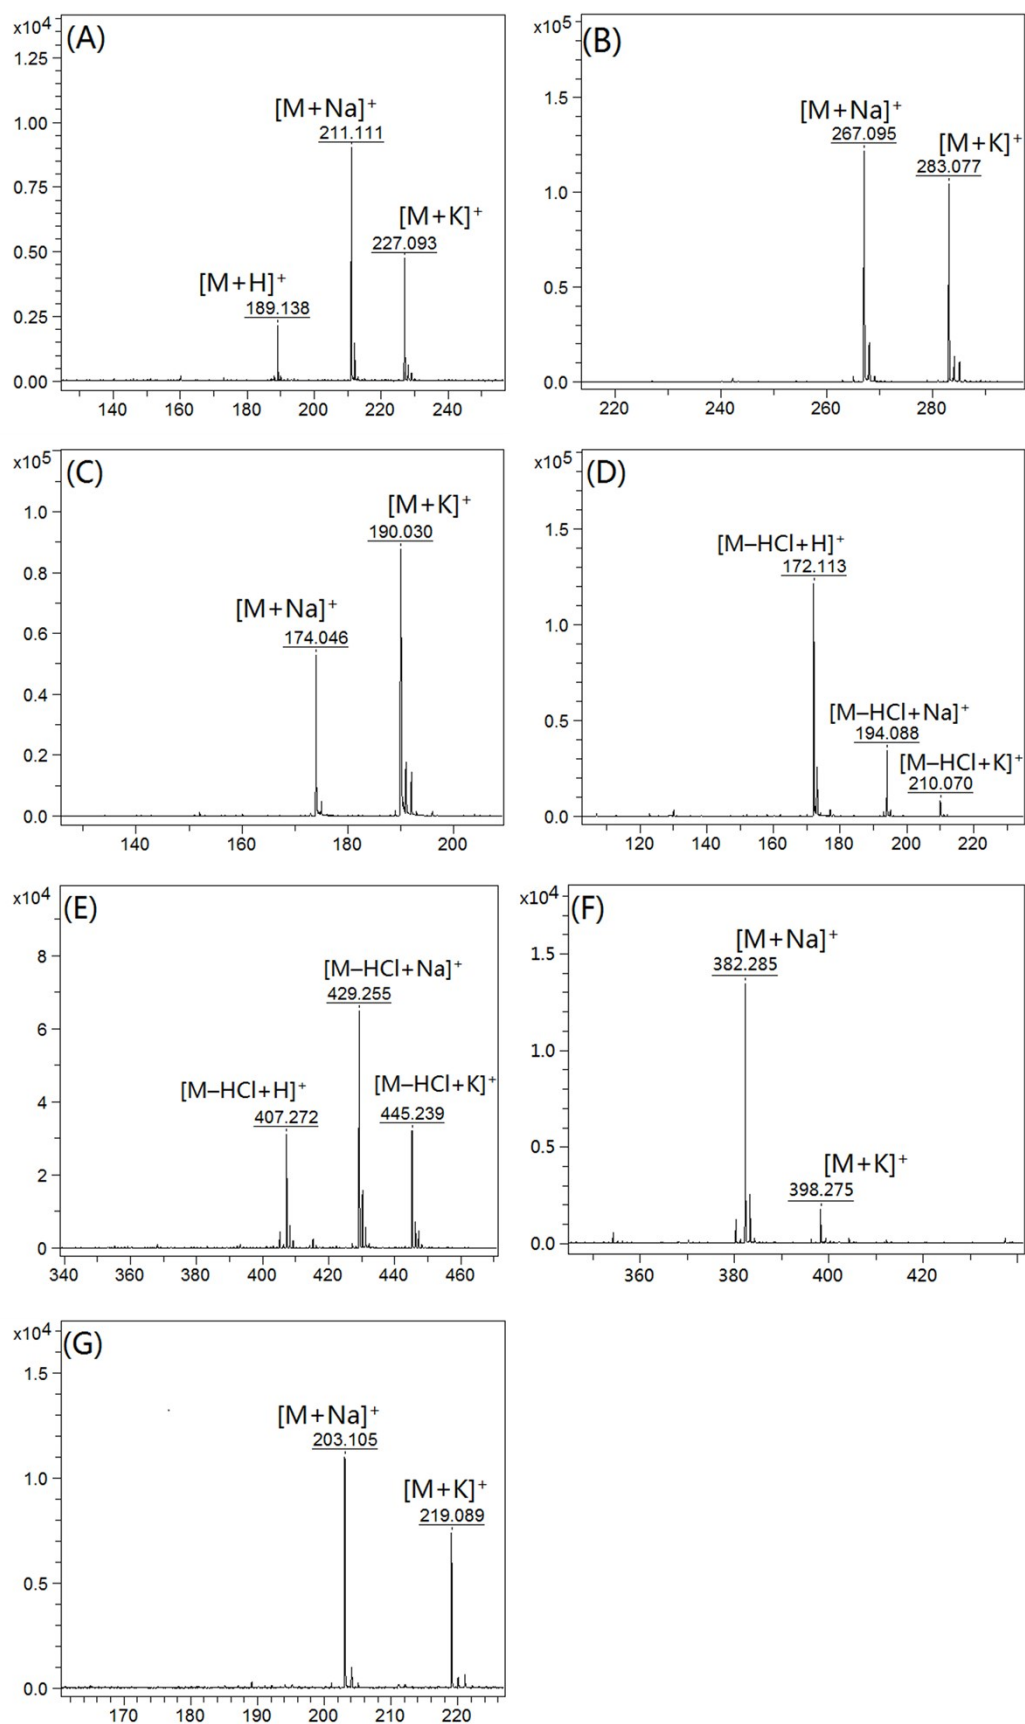

**Figure S2.** MALDI-TOF spectra detected by  $Fe_3O_4$  NPs matrix in positive and reflectron mode of. (A) ATPR; (B) RTCA; (C) APAP; (D) ABOB; (E) LCM; (F) ENR; (G) Glu.

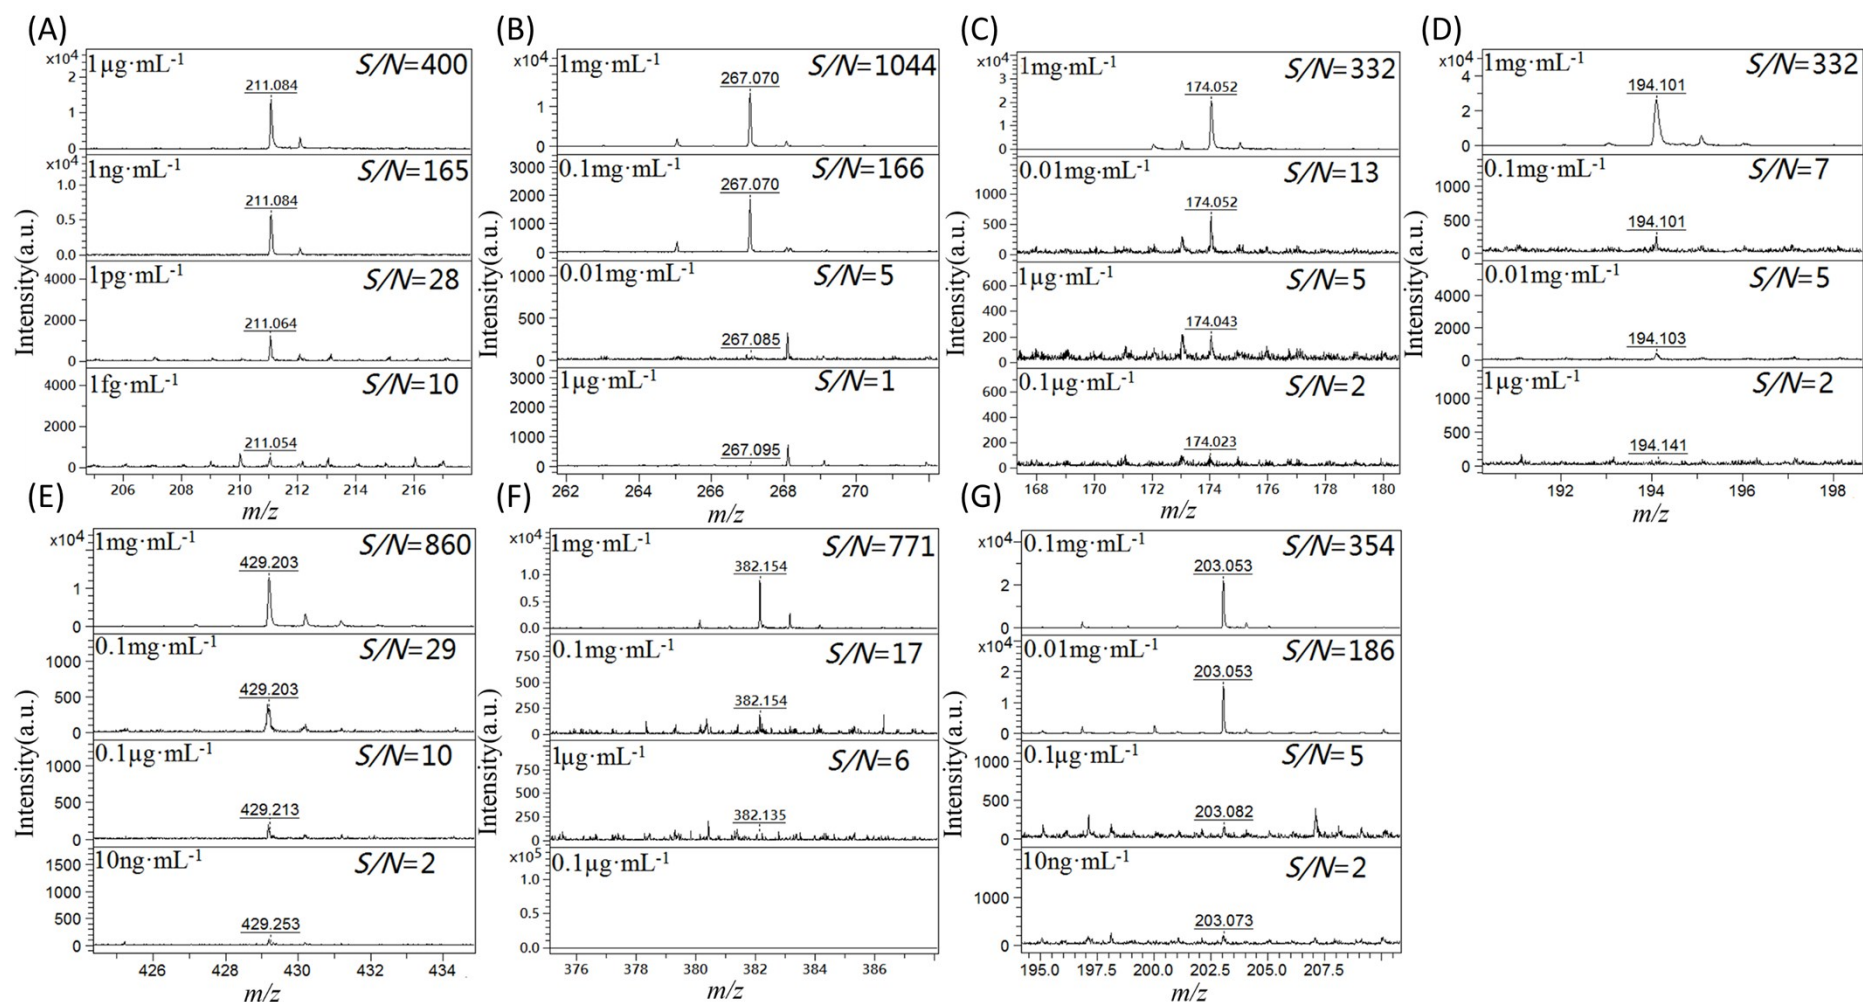

**Figure S3.** MALDI-TOF spectra detected by  $\text{Fe}_3\text{O}_4$  NPs matrix in positive and reflectron mode with different concentrations of (A) ATPR; (B) RTCA; (C) APAP; (D) ABOB; (E) LCM; (F) ENR; (G) Glu.

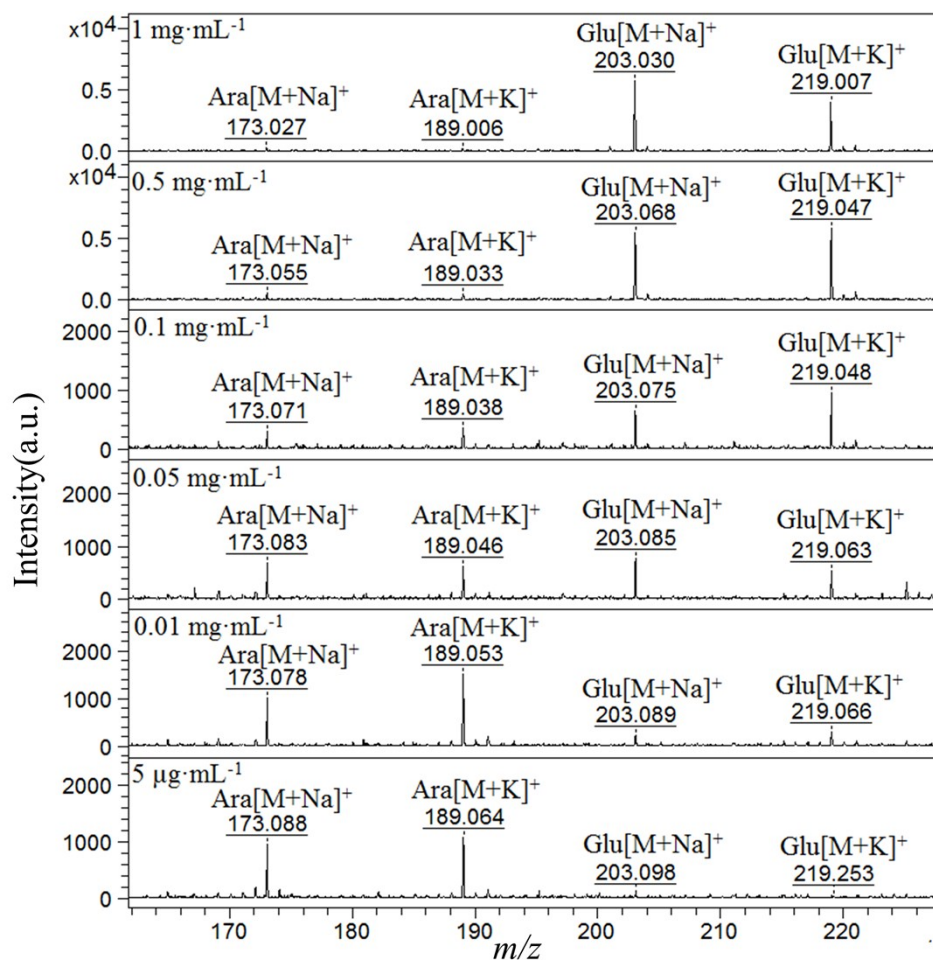

**Figure S4.** MALDI-TOF spectrum detected by Fe<sub>3</sub>O<sub>4</sub> NPs matrix in positive and reflectron mode for 0.05 mg·mL<sup>-1</sup> Ara with different concentrations of Glu, (A) 1 mg·mL<sup>-1</sup>; (B) 0.5 mg·mL<sup>-1</sup>; (C) 0.1 mg·mL<sup>-1</sup>; (D) 0.05 mg·mL<sup>-1</sup>; (E) 0.01 mg·mL<sup>-1</sup>; (F) 0.005 mg·mL<sup>-1</sup>.

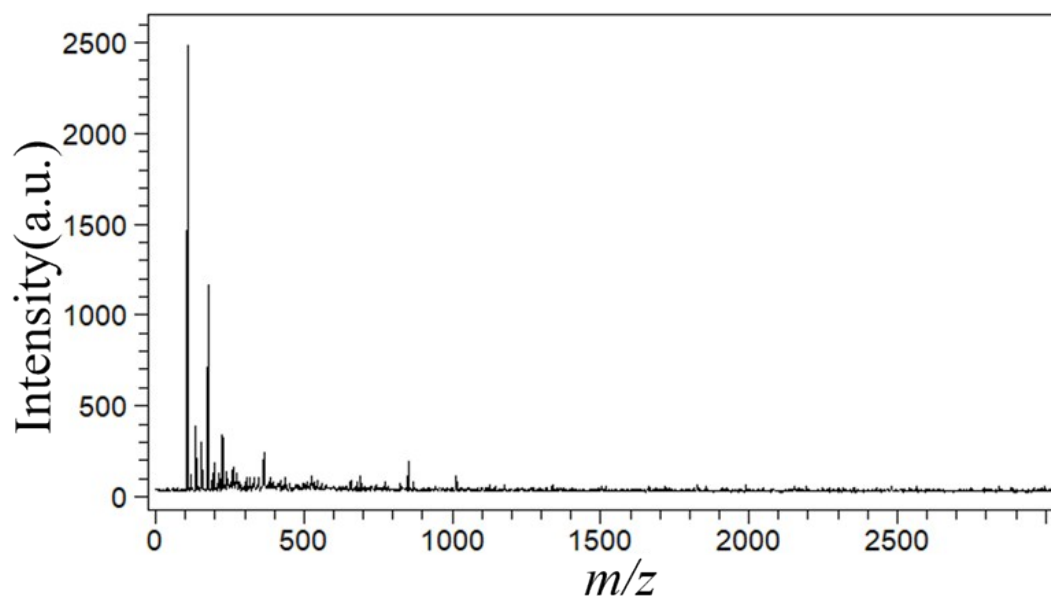

**Figure S5.** MALDI-TOF spectrum for DHB/N-MA without secondary matrix in positive and reflectron mode.

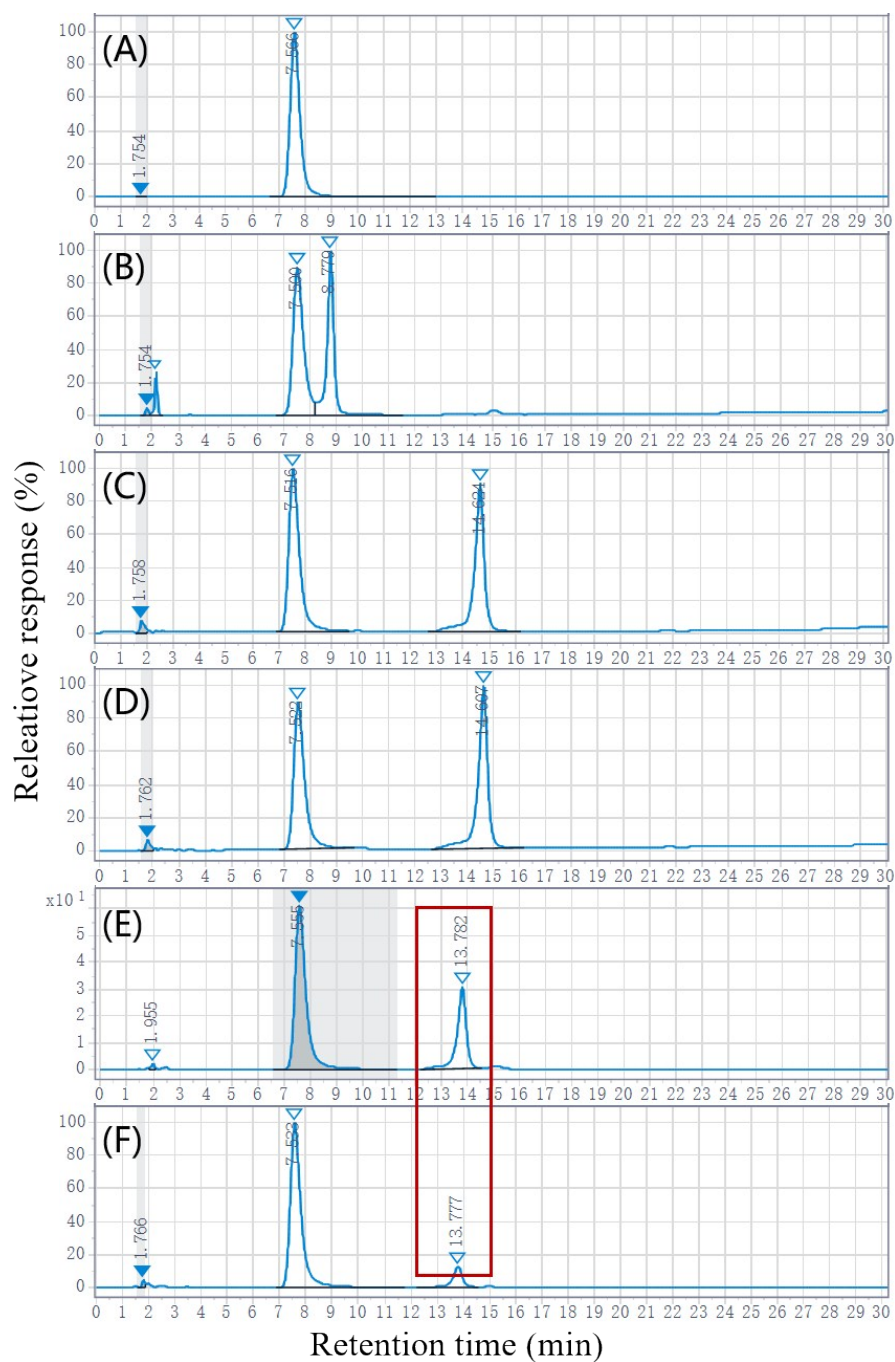

**Figure S6.** HPLC chromatograms of monosaccharide analysis for different compounds. (A) PMP standard; (B) Man standard; (C) Gal standard; (D) Fru standard; (E) Glu standard; (F) APS-1 real sample.

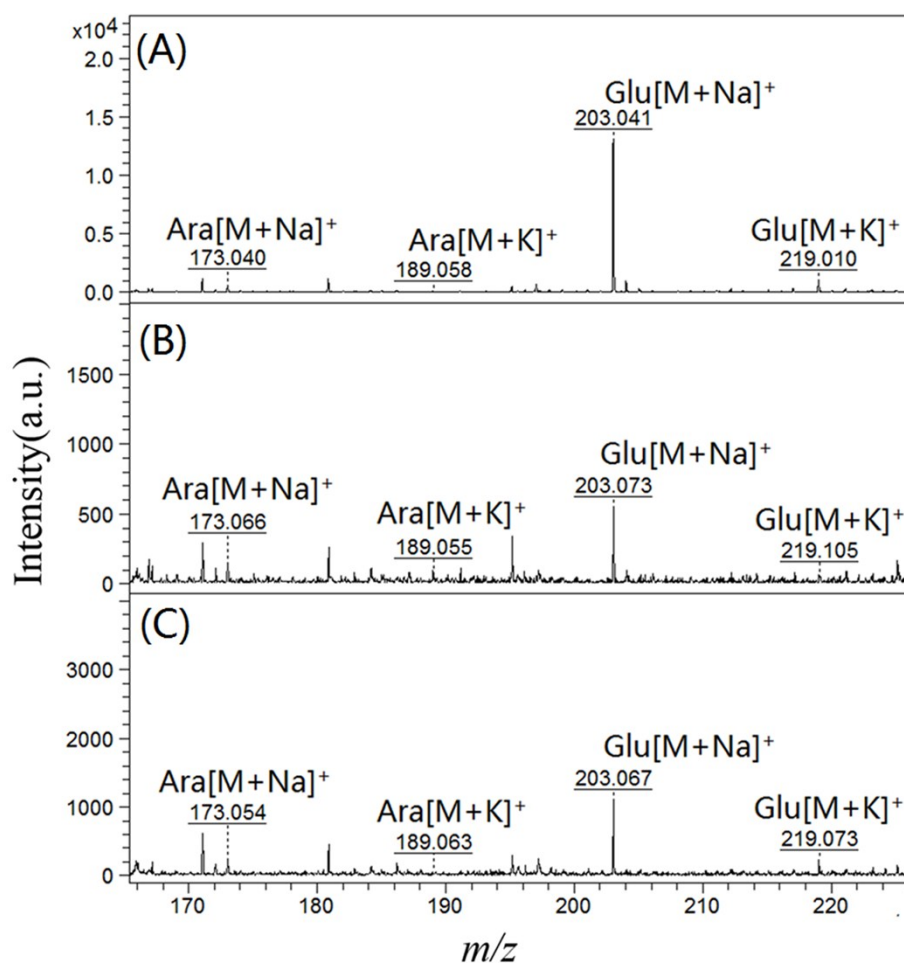

**Figure S7.** MALDI-TOF spectra for Glu in APS samples with 0.05 mg·mL<sup>-1</sup> Ara detected by Fe<sub>3</sub>O<sub>4</sub> NPs matrix in positive and reflectron mode. (A) APS-1; (B) APS-4; (C) APS-5.



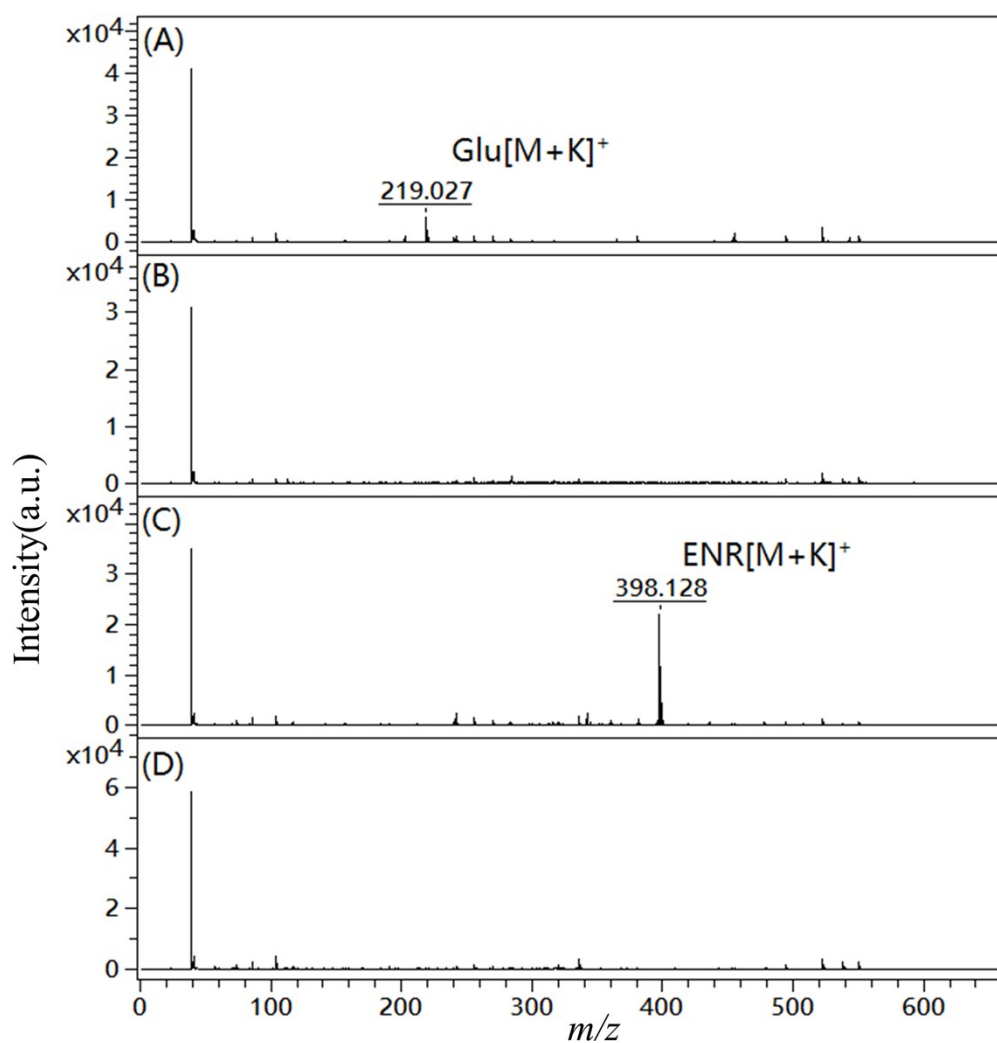

**Figure S8.** MALDI-TOF spectrums detected by  $\text{Fe}_3\text{O}_4$  NPs matrix in positive and reflectron mode for four kinds of LNT samples. (A) LNT-1; (B) LNT-2; (C) LNT-3; (D) LNT-4.

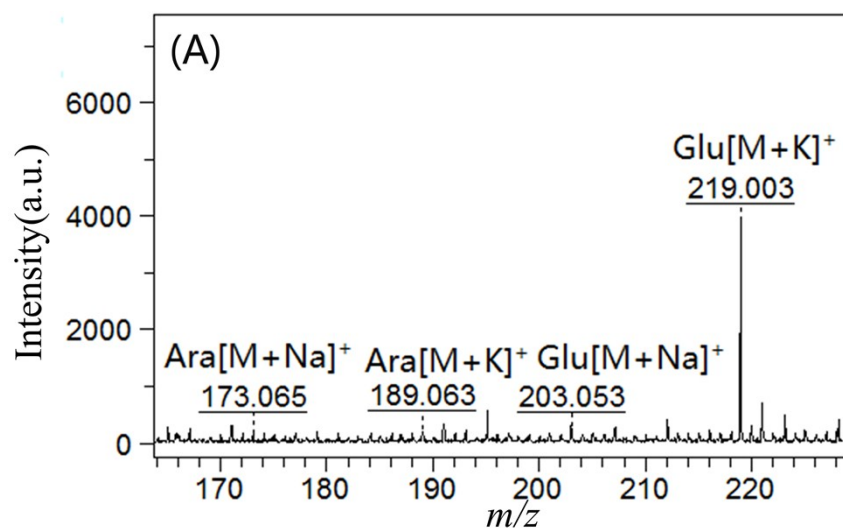

**Figure S9.** MALDI-TOF spectrum for Glu in sample LNT-1 with 0.05 mg·mL<sup>-1</sup> Ara detected by Fe<sub>3</sub>O<sub>4</sub> NPs matrix in positive and reflectron mode.

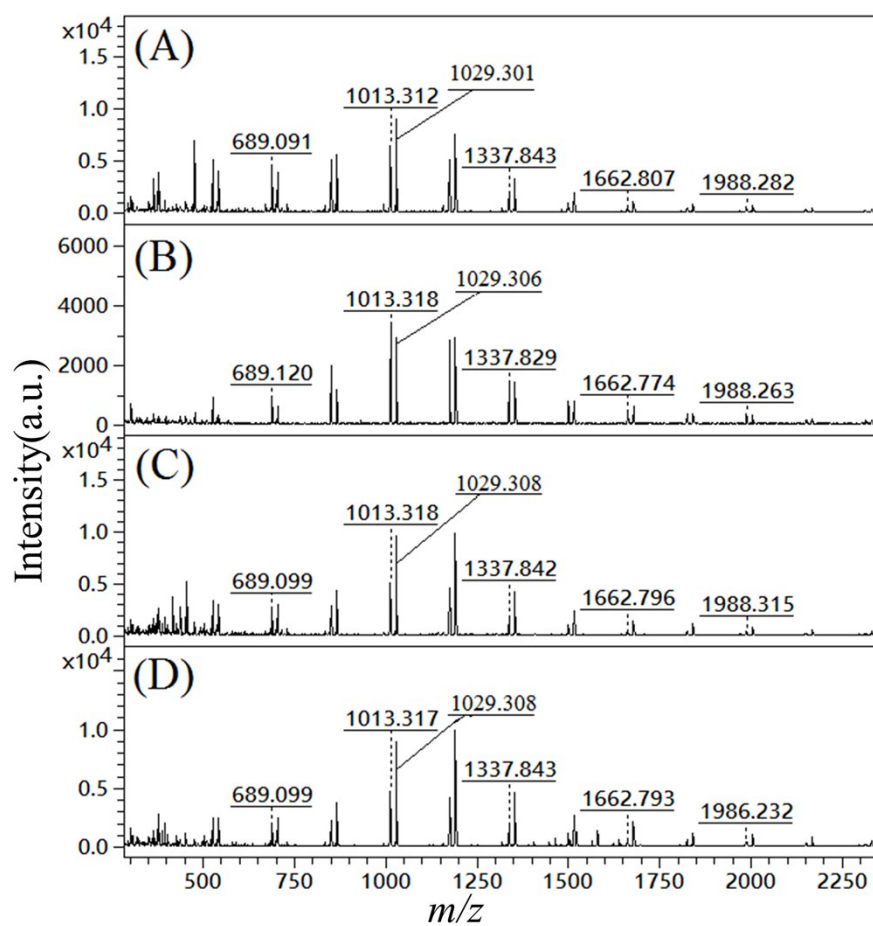

**Figure S10.** MALDI-TOF spectrums detected by DHB/N-MA matrix in positive and reflectron mode for four kinds of LNT samples. (A) LNT-1; (B) LNT-2; (C) LNT-3; (D) LNT-4.
